# Supplementary material
Source: publisher site journal article supplement (https://www.dovepress.com/article/280690)
Supplement: Supplementary file 1 [file get_supplementary_file.php]

**Electronic supplementary material (ESM) Table**

Table S: Antibodies used for Western blots

| Antibody | Description | Dilution | Supplier | Country |
| --- | --- | --- | --- | --- |
| Anti-Twist | Mouse monoclonal | 1:500 | Santa Cruz | USA |
| Anti- Slug | Mouse monoclonal | 1:500 | Santa Cruz | USA |
| Anti-Snail | Mouse monoclonal | 1:500 | Santa Cruz | USA |
| Anti-E-Cadherin  Anti-N-Cadherin  Anti-Vimentin  Anti-GAPDH  APOC1 | Mouse monoclonal  Mouse Monoclonal  Mouse Monoclonal Mouse Monoclonal  Mouse Monoclonal | 1: 500  1: 1000  1: 1000  1: 1000  1：500 | Santa Cruz  Santa Cruz  Santa Cruz  Beyotime  Santa Cruz | USA  USA  USA  China  USA |
